# Supplementary material for: First genetic linkage map of Taraxacum koksaghyz Rodin based on AFLP, SSR, COS and EST-SSR markers
Source: PubMed Central journal article supplement (PMC4973268; doi:10.1038/srep31031), 2016-08-04
Supplement: srep31031-s1.pdf [file srep31031-s1.pdf]

Supplementary Material (Marina Arias).

First genetic linkage map of *Taraxacum koksaghyz* Rodin based on AFLP, SSR, COS and EST-SSR markers.

Marina Arias 1,\* , Monica Hernandez 1, Naroa Remondegui1, Koen Huvenaars2, Peter van Dijk2, Enrique Ritter1.

**Supplementary Table S1: Polymorphisms and map locations of COS, SSR and EST-SSR markers**

**a) MARKERS generating segregating polymorphisms for Linkage Mapping**

| Marker Name    | Type    | Original Name        | Origin | Species                                       | LG      | Position (cM)    |
|----------------|---------|----------------------|--------|-----------------------------------------------|---------|------------------|
| A25            | COS     | A25                  | 25     | <i>Helianthus annuus L., Lactuca sativa L</i> | NM      | NM               |
| A19            | COS     | A19                  | 25     | <i>Helianthus annuus L., Lactuca sativa L</i> | 8       | 43.8             |
| A27            | COS     | A27                  | 25     | <i>Helianthus annuus L., Lactuca sativa L</i> | 3       | 94.4             |
| B12            | COS     | B12                  | 25     | <i>Helianthus annuus L., Lactuca sativa L</i> | 4       | 123.1            |
| C29            | COS     | C29                  | 25     | <i>Helianthus annuus L., Lactuca sativa L</i> | 1       | 11.9             |
| C06            | COS     | C06                  | 25     | <i>Helianthus annuus L., Lactuca sativa L</i> | 6       | 27.3             |
| D05            | COS     | D05                  | 25     | <i>Helianthus annuus L., Lactuca sativa L</i> | 3       | 40.9             |
| SML038         | SSR     | SML038               | 27     | <i>Lactuca sativa, Lactuca serriola</i>       | 4       | 41.4             |
| TC1            | EST-SSR | CTO25807.b1_M11.ab1  | 26     | <i>Taraxacum officinale</i>                   | 4       | 97.2             |
| TC6 a, b       | EST-SSR | CTOX13028.b1_H18.ab1 | 26     | <i>Taraxacum officinale</i>                   | 8, 7    | 48.9/ 38.6       |
| TC8 a, b       | EST-SSR | CTOX2895.b1_M04.ab1  | 26     | <i>Taraxacum officinale</i>                   | 7, 5    | 39.5/ 42         |
| TC13           | EST-SSR | CTOY10260.b1_G22.ab1 | 26     | <i>Taraxacum officinale</i>                   | 1       | 17.7             |
| TC14           | EST-SSR | CTOX1362.b1_C06.ab1  | 26     | <i>Taraxacum officinale</i>                   | 7       | 22.9             |
| TC16           | EST-SSR | CTOY12295.b1_M01.ab1 | 26     | <i>Taraxacum officinale</i>                   | 4       | 50.7             |
| TC19           | EST-SSR | CTOY16062.b1_L08.ab1 | 26     | <i>Taraxacum officinale</i>                   | 8       | 26.9             |
| TC22           | EST-SSR | CTOX15864.b2_P05.ab1 | 26     | <i>Taraxacum officinale</i>                   | 4       | NM               |
| TC25           | EST-SSR | CTOY16815.b1_N04.ab1 | 26     | <i>Taraxacum officinale</i>                   | 2       | 69.5             |
| TC26           | EST-SSR | CTOY6705.b1_B21.ab1  | 26     | <i>Taraxacum officinale</i>                   | 5       | 92.5             |
| TC27           | EST-SSR | CTOY16332.b1_G04.ab1 | 26     | <i>Taraxacum officinale</i>                   | 7       | 64.7             |
| TC28 a, b      | EST-SSR | CTOY9502.b1_K24.ab1  | 26     | <i>Taraxacum officinale</i>                   | 1, 4    | 73.2/ 12.8       |
| TC29           | EST-SSR | CTOZ2149.b1_I10.ab1  | 26     | <i>Taraxacum officinale</i>                   | 1       | 11.5             |
| TC31           | EST-SSR | CTOY14088.b1_O18.ab1 | 26     | <i>Taraxacum officinale</i>                   | 5       | 9.3              |
| TC32           | EST-SSR | CTOY6345.b1_A04.ab1  | 26     | <i>Taraxacum officinale</i>                   | 4       | 7.9              |
| TC38           | EST-SSR | CTOX4156.b1_H08.ab1  | 26     | <i>Taraxacum officinale</i>                   | 4       | 133.1            |
| TC41           | EST-SSR | CTOX6656.b1_P07.ab1  | 26     | <i>Taraxacum officinale</i>                   | 4       | 63.3             |
| TC42           | EST-SSR | CTOX3406.b1_L12.ab1  | 26     | <i>Taraxacum officinale</i>                   | 5       | 27.1             |
| TC45           | EST-SSR | CTOY15765.b1_I05.ab1 | 26     | <i>Taraxacum officinale</i>                   | 5       | 89.8             |
| TC46           | EST-SSR | CTOX3118.b1_K11.ab1  | 26     | <i>Taraxacum officinale</i>                   | 6       | 7.7              |
| TC49           | EST-SSR | CTOY12359.b1_M17.ab1 | 26     | <i>Taraxacum officinale</i>                   | 1       | 64.8             |
| TC50           | EST-SSR | CTOY4713.b1_B03.ab1  | 26     | <i>Taraxacum officinale</i>                   | 7       | 59.2             |
| TC60           | EST-SSR | CTOX20584.b1_O10.ab1 | 26     | <i>Taraxacum officinale</i>                   | 5       | 75.3             |
| TC61           | EST-SSR | CTOX21360.b1_O12.ab1 | 26     | <i>Taraxacum officinale</i>                   | 3       | 65.2             |
| TC66           | EST-SSR | CTOZ5866.b1_D03.ab1  | 26     | <i>Taraxacum officinale</i>                   | 7       | 66.1             |
| TC69           | EST-SSR | CTOY541.b1_J15.ab1   | 26     | <i>Taraxacum officinale</i>                   | 2       | 33.7             |
| TC71           | EST-SSR | CTOY7144.b1_O10.ab1  | 26     | <i>Taraxacum officinale</i>                   | 4       | 52.7             |
| TC73           | EST-SSR | CTO26139.b1_F24.ab1  | 26     | <i>Taraxacum officinale</i>                   | 6       | 20.0             |
| TC77           | EST-SSR | CTOY6581.b1_I13.ab1  | 26     | <i>Taraxacum officinale</i>                   | 5       | 118.6            |
| TC80           | EST-SSR | CTOX3167.b1_M23.ab1  | 26     | <i>Taraxacum officinale</i>                   | 3       | 68.5             |
| TC82           | EST-SSR | CTOX10820.b1_G17.ab1 | 26     | <i>Taraxacum officinale</i>                   | 4       | 29.3/4.1         |
| TC83           | EST-SSR | CTOY2493.b1_J23.ab1  | 26     | <i>Taraxacum officinale</i>                   | 3       | 59.8             |
| TC84           | EST-SSR | CTOX21042.b2_D06.ab1 | 26     | <i>Taraxacum officinale</i>                   | 1       | 82.1             |
| TC333          | EST-SSR | CTOZ557.b1_J19.ab1   | 26     | <i>Taraxacum officinale</i>                   | 4       | 92.5             |
| TC366          | EST-SSR | CTOX2226.b1_D06.ab1  | 26     | <i>Taraxacum officinale</i>                   | NM      | NM               |
| TC129          | EST-SSR | CTOX3546.b1_C23.ab1  | 26     | <i>Taraxacum officinale</i>                   | 3       | 59.8             |
| TC324          | EST-SSR | CTOY9549.b1_J12.ab1  | 26     | <i>Taraxacum officinale</i>                   | 3       | 9.7              |
| TC128          | EST-SSR | CTOX3025.b1_B14.ab1  | 26     | <i>Taraxacum officinale</i>                   | 1       | 36.1             |
| TC249          | EST-SSR | CTOY7335.b1_M09.ab1  | 26     | <i>Taraxacum officinale</i>                   | 1       | 68.7             |
| TC295          | EST-SSR | CTOY11596.b1_G19.ab1 | 26     | <i>Taraxacum officinale</i>                   | 4       | 12.8             |
| TC165          | EST-SSR | CTOX11102.b1_L16.ab1 | 26     | <i>Taraxacum officinale</i>                   | 6       | 73.7             |
| TC585          | EST-SSR | CTOY13605.b1_J17.ab1 | 26     | <i>Taraxacum officinale</i>                   | 1       | 101.4            |
| TC438          | EST-SSR | CTOY8370.b1_D06.ab1  | 26     | <i>Taraxacum officinale</i>                   | 5       | 92.5             |
| TC713          | EST-SSR | CTOX10577.b1_A06.ab1 | 26     | <i>Taraxacum officinale</i>                   | 5       | 49.9             |
| TC461          | EST-SSR | CTOX11812.b1_H02.ab1 | 26     | <i>Taraxacum officinale</i>                   | 5       | 118.6            |
| TC2059         | EST-SSR | CTOX13056.b1_P24.ab1 | 26     | <i>Taraxacum officinale</i>                   | 8       | 0.0              |
| TC303          | EST-SSR | CTOY15535.b1_N19.ab1 | 26     | <i>Taraxacum officinale</i>                   | 1       | 38.2             |
| TC380          | EST-SSR | CTOY10164.b1_H21.ab1 | 26     | <i>Taraxacum officinale</i>                   | 1       | 47.3             |
| TC428 a, b     | EST-SSR | CTOY6406.b1_K18.ab1  | 26     | <i>Taraxacum officinale</i>                   | 1, 4    | 74.0/ 12.8       |
| TC454          | EST-SSR | CTOX10662.b1_L02.ab1 | 26     | <i>Taraxacum officinale</i>                   | 2       | 33.3             |
| TC494          | EST-SSR | CTOX17932.b1_G20.ab1 | 26     | <i>Taraxacum officinale</i>                   | 3       | 27.6             |
| TC506          | EST-SSR | CTOX20035.b1_E17.ab1 | 26     | <i>Taraxacum officinale</i>                   | 5       | 20.5             |
| TC624          | EST-SSR | CTOY6017.b1_A18.ab1  | 26     | <i>Taraxacum officinale</i>                   | 7       | 56.2             |
| TC731          | EST-SSR | CTOX1290.b1_D11.ab1  | 26     | <i>Taraxacum officinale</i>                   | 7       | 96.1             |
| TC946 a, b, c  | EST-SSR | CTOY13679.b1_M12.ab1 | 26     | <i>Taraxacum officinale</i>                   | 8, 7, 6 | 88.9/ 14.1/ 71.7 |
| TC1107         | EST-SSR | CTOX12029.b1_J07.ab1 | 26     | <i>Taraxacum officinale</i>                   | 4       | 20.6             |
| TC360          | EST-SSR | CTOX20447.b1_M23.ab1 | 26     | <i>Taraxacum officinale</i>                   | 7       | 26.1             |
| TC365          | EST-SSR | CTOX22195.b1_F06.ab1 | 26     | <i>Taraxacum officinale</i>                   | 4       | 7.9              |
| R1210L3 (1)    | STS     | R1210L3 (1)          | 29     | <i>Cichorium intybus</i>                      | ----    | ----             |
| L101L1/R1 (3)  | STS     | L101L1/R1 (3)        | 29     | <i>Cichorium intybus</i>                      | ----    | ----             |
| AF497999L2 (1) | STS     | AF497999L2 (1)       | 29     | <i>Cichorium intybus</i>                      | ----    | ----             |

**Legend:** NM: Not Mapped; COS: Conserved Ortholog Set; SSR: Simple Sequence Repeat; EST-SSR: Expressed Sequence Tag-Simple Sequence Repeat; STS: Sequence-Tagged Sites; TC: EST-SSR given name; Origin: Bibliographic reference.

**b) MARKERS without useful amplification products or monomorphic**

| Marker          | Type    | Original Name        | Origin | Species                             | Marker | Type    | Original Name        | Origin | Species                     |
|-----------------|---------|----------------------|--------|-------------------------------------|--------|---------|----------------------|--------|-----------------------------|
| D22             | COS     | D22                  | 25     | <i>H. annuus L., L. sativa L.</i>   | TC11   | EST-SSR | CTOX13045.b1_J22.ab1 | 26     | <i>Taraxacum officinale</i> |
| A28             | COS     | A28                  | 25     | <i>H. annuus L., L. sativa L.</i>   | TC12   | EST-SSR | CTOY8308.b1_G14.ab1  | 26     | <i>Taraxacum officinale</i> |
| A39             | COS     | A39                  | 25     | <i>H. annuus L., L. sativa L.</i>   | TC15   | EST-SSR | CTOY10102.b1_L05.ab1 | 26     | <i>Taraxacum officinale</i> |
| B07             | COS     | B07                  | 25     | <i>H. annuus L., L. sativa L.</i>   | TC17   | EST-SSR | CTOY17001.b1_B03.ab1 | 26     | <i>Taraxacum officinale</i> |
| B27             | COS     | B27                  | 25     | <i>H. annuus L., L. sativa L.</i>   | TC18   | EST-SSR | CTOY8178.b1_D05.ab1  | 26     | <i>Taraxacum officinale</i> |
| C32             | COS     | C32                  | 25     | <i>H. annuus L., L. sativa L.</i>   | TC20   | EST-SSR | CTOZ5155.b1_F17.ab1  | 26     | <i>Taraxacum officinale</i> |
| D22             | COS     | D22                  | 25     | <i>H. annuus L., L. sativa L.</i>   | TC21   | EST-SSR | CTOY7019.b1_F03.ab1  | 26     | <i>Taraxacum officinale</i> |
| A33             | COS     | A33                  | 25     | <i>H. annuus L., L. sativa L.</i>   | TC23   | EST-SSR | CTOX17822.b1_L15.ab1 | 26     | <i>Taraxacum officinale</i> |
| C01             | COS     | C01                  | 25     | <i>H. annuus L., L. sativa L.</i>   | TC24   | EST-SSR | CTOY11228.b1_G23.ab1 | 26     | <i>Taraxacum officinale</i> |
| A01             | COS     | A01                  | 25     | <i>H. annuus L., L. sativa L.</i>   | TC30   | EST-SSR | CTOX5018.b1_C07.ab1  | 26     | <i>Taraxacum officinale</i> |
| A02             | COS     | A02                  | 25     | <i>H. annuus L., L. sativa L.</i>   | TC33   | EST-SSR | CTOX1131.b1_F20.ab1  | 26     | <i>Taraxacum officinale</i> |
| A03             | COS     | A03                  | 25     | <i>H. annuus L., L. sativa L.</i>   | TC34   | EST-SSR | CTOY16350.b1_K08.ab1 | 26     | <i>Taraxacum officinale</i> |
| A04             | COS     | A04                  | 25     | <i>H. annuus L., L. sativa L.</i>   | TC35   | EST-SSR | CTOY9350.b1_L09.ab1  | 26     | <i>Taraxacum officinale</i> |
| A05             | COS     | A05                  | 25     | <i>H. annuus L., L. sativa L.</i>   | TC36   | EST-SSR | CTOX18095.b1_M11.ab1 | 26     | <i>Taraxacum officinale</i> |
| A06             | COS     | A06                  | 25     | <i>H. annuus L., L. sativa L.</i>   | TC37   | EST-SSR | CTOX22367.b1_M23.ab1 | 26     | <i>Taraxacum officinale</i> |
| A07             | COS     | A07                  | 25     | <i>H. annuus L., L. sativa L.</i>   | TC39   | EST-SSR | CTOY12186.b1_C24.ab1 | 26     | <i>Taraxacum officinale</i> |
| A08             | COS     | A08                  | 25     | <i>H. annuus L., L. sativa L.</i>   | TC40   | EST-SSR | CTOY4029.b1_J23.ab1  | 26     | <i>Taraxacum officinale</i> |
| A09             | COS     | A09                  | 25     | <i>H. annuus L., L. sativa L.</i>   | TC43   | EST-SSR | CTOY15841.b1_B01.ab1 | 26     | <i>Taraxacum officinale</i> |
| A10             | COS     | A10                  | 25     | <i>H. annuus L., L. sativa L.</i>   | TC44   | EST-SSR | CTOX10565.b1_I02.ab1 | 26     | <i>Taraxacum officinale</i> |
| SML023          | SSR     | SML023               | 27     | <i>L. serriola L., L. sativa L.</i> | TC47   | EST-SSR | CTOY14348.b1_H11.ab1 | 26     | <i>Taraxacum officinale</i> |
| SML026          | SSR     | SML026               | 27     | <i>L. serriola L., L. sativa L.</i> | TC48   | EST-SSR | CTOY10472.b1_P01.ab1 | 26     | <i>Taraxacum officinale</i> |
| SML027          | SSR     | SML027               | 27     | <i>L. serriola L., L. sativa L.</i> | TC51   | EST-SSR | CTOX16123.b2_F24.ab1 | 26     | <i>Taraxacum officinale</i> |
| SML031          | SSR     | SML031               | 27     | <i>L. serriola L., L. sativa L.</i> | TC52   | EST-SSR | CTOY15494.b1_L09.ab1 | 26     | <i>Taraxacum officinale</i> |
| SML033          | SSR     | SML033               | 27     | <i>L. serriola L., L. sativa L.</i> | TC53   | EST-SSR | CTOY4904.b1_P02.ab1  | 26     | <i>Taraxacum officinale</i> |
| SML034          | SSR     | SML034               | 27     | <i>L. serriola L., L. sativa L.</i> | TC54   | EST-SSR | CTOX13472.b1_O07.ab1 | 26     | <i>Taraxacum officinale</i> |
| SML037          | SSR     | SML037               | 27     | <i>L. serriola L., L. sativa L.</i> | TC55   | EST-SSR | CTOX844.b1_G19.ab1   | 26     | <i>Taraxacum officinale</i> |
| SML044          | SSR     | SML044               | 27     | <i>L. serriola L., L. sativa L.</i> | TC56   | EST-SSR | CTOY2219.b1_F04.ab1  | 26     | <i>Taraxacum officinale</i> |
| SML054          | SSR     | SML054               | 27     | <i>L. serriola L., L. sativa L.</i> | TC57   | EST-SSR | CTOY9300.b1_G21.ab1  | 26     | <i>Taraxacum officinale</i> |
| AF49800L2/R2    | STSs    | AF49800L2/R2         | 29     | <i>Cichorium intybus</i>            | TC58   | EST-SSR | CTOX12095.b1_N23.ab1 | 26     | <i>Taraxacum officinale</i> |
| CIFRUCTOSL3/R2  | STSs    | CIFRUCTOSL3/R2       | 29     | <i>Cichorium intybus</i>            | TC59   | EST-SSR | CTOX17553.b1_A22.ab1 | 26     | <i>Taraxacum officinale</i> |
| SKL95UTR9LI9R6  | STSs    | SKL95UTR9LI9R6       | 29     | <i>Cichorium intybus</i>            | TC62   | EST-SSR | CTOY4099.b1_E18.ab1  | 26     | <i>Taraxacum officinale</i> |
| 3262L1/R1       | STSs    | 3262L1/R1            | 29     | <i>Cichorium intybus</i>            | TC63   | EST-SSR | CTOY8251.b1_F23.ab1  | 26     | <i>Taraxacum officinale</i> |
| cAMP2L2/R2      | STSs    | cAMP2L2/R2           | 29     | <i>Cichorium intybus</i>            | TC64   | EST-SSR | CTOX10454.b1_K21.ab1 | 26     | <i>Taraxacum officinale</i> |
| CIPinvert L2/R2 | STSs    | CIPinvert L2/R2      | 29     | <i>Cichorium intybus</i>            | TC65   | EST-SSR | CTOY13783.b1_N14.ab1 | 26     | <i>Taraxacum officinale</i> |
| TubulinL2/R2    | STSs    | TubulinL2/R2         | 29     | <i>Cichorium intybus</i>            | TC67   | EST-SSR | CTOY5074.b1_C21.ab1  | 26     | <i>Taraxacum officinale</i> |
| ORS543          | SSR     | ORS543               | 28     | <i>Helianthus annuus L</i>          | TC68   | EST-SSR | CTOX1070.b1_L04.ab1  | 26     | <i>Taraxacum officinale</i> |
| ORS342          | SSR     | ORS342               | 28     | <i>Helianthus annuus L</i>          | TC70   | EST-SSR | CTOX21376.b1_O16.ab1 | 26     | <i>Taraxacum officinale</i> |
| ORS665          | SSR     | ORS665               | 28     | <i>Helianthus annuus L</i>          | TC72   | EST-SSR | CTOY9753.b1_B15.ab1  | 26     | <i>Taraxacum officinale</i> |
| ORS309          | SSR     | ORS309               | 28     | <i>Helianthus annuus L</i>          | TC74   | EST-SSR | CTOX19900.b1_H08.ab1 | 26     | <i>Taraxacum officinale</i> |
| ORS1024         | SSR     | ORS1024              | 28     | <i>Helianthus annuus L</i>          | TC75   | EST-SSR | CTOY16997.b1_I01.ab1 | 26     | <i>Taraxacum officinale</i> |
| ORS483          | SSR     | ORS483               | 28     | <i>Helianthus annuus L</i>          | TC76   | EST-SSR | CTOY4329.b1_B03.ab1  | 26     | <i>Taraxacum officinale</i> |
| ORS1041         | SSR     | ORS1041              | 28     | <i>Helianthus annuus L</i>          | TC78   | EST-SSR | CTOX12491.b1_E04.ab1 | 26     | <i>Taraxacum officinale</i> |
| ORS1161         | SSR     | ORS1161              | 28     | <i>Helianthus annuus L</i>          | TC79   | EST-SSR | CTOX1466.b1_D08.ab1  | 26     | <i>Taraxacum officinale</i> |
| ORS844          | SSR     | ORS844               | 28     | <i>Helianthus annuus L</i>          | TC81   | EST-SSR | CTOY10374.b1_K01.ab1 | 26     | <i>Taraxacum officinale</i> |
| ORS437          | SSR     | ORS437               | 28     | <i>Helianthus annuus L</i>          | TC320  | EST-SSR | CTOY7284.b1_H22.ab1  | 26     | <i>Taraxacum officinale</i> |
| ORS1146         | SSR     | ORS1146              | 28     | <i>Helianthus annuus L</i>          | TC326  | EST-SSR | *CTOZ1627.b1_E23.ab1 | 26     | <i>Taraxacum officinale</i> |
| ORS778          | SSR     | ORS778               | 28     | <i>Helianthus annuus L</i>          | TC294  | EST-SSR | CTOY10206.b1_K08.ab1 | 26     | <i>Taraxacum officinale</i> |
| ORS1179         | SSR     | ORS1179              | 28     | <i>Helianthus annuus L</i>          | TC93   | EST-SSR | CTOX21614.b1_L03.ab1 | 26     | <i>Taraxacum officinale</i> |
| ORS307          | SSR     | ORS307               | 28     | <i>Helianthus annuus L</i>          | TC444  | EST-SSR | CTOZ1761.b1_A10.ab1  | 26     | <i>Taraxacum officinale</i> |
| ORS687          | SSR     | ORS687               | 28     | <i>Helianthus annuus L</i>          | TC386  | EST-SSR | CTOY11590.b1_K17.ab1 | 26     | <i>Taraxacum officinale</i> |
| ORS750          | SSR     | ORS750               | 28     | <i>Helianthus annuus L</i>          | TC188  | EST-SSR | CTOX13943.b1_N05.ab1 | 26     | <i>Taraxacum officinale</i> |
| ORS735          | SSR     | ORS735               | 28     | <i>Helianthus annuus L</i>          | TC365  | EST-SSR | CTOX22195.b1_F06.ab1 | 26     | <i>Taraxacum officinale</i> |
| Let1            | COS-EST | QGF13H13.yg.ab1      | 27     | <i>L. serriola L., L. sativa L.</i> | TC418  | EST-SSR | CTOY3757.b1_J04.ab1  | 26     | <i>Taraxacum officinale</i> |
| Let2            | COS-EST | QGD7O20.yg.ab1       | 27     | <i>L. serriola L., L. sativa L.</i> | TC1555 | EST-SSR | CTOY3131.b1_E15.ab1  | 26     | <i>Taraxacum officinale</i> |
| Let3            | COS-EST | QG_CA_Contig1410     | 27     | <i>L. serriola L., L. sativa L.</i> | TC562  | EST-SSR | CTOY10304.b1_P08.ab1 | 26     | <i>Taraxacum officinale</i> |
| Let4            | COS-EST | QG_CA_Contig6178     | 27     | <i>L. serriola L., L. sativa L.</i> | TC489  | EST-SSR | CTOX16428.b1_H04.ab1 | 26     | <i>Taraxacum officinale</i> |
| Let5            | COS-EST | QGF23G16.yg.ab1      | 27     | <i>L. serriola L., L. sativa L.</i> | TC543  | EST-SSR | CTOX4545.b1_B10.ab1  | 26     | <i>Taraxacum officinale</i> |
| TC2             | EST-SSR | CTOX19837.b1_I16.ab1 | 26     | <i>Taraxacum officinale</i>         | TC624  | EST-SSR | CTOY6017.b1_A18.ab1  | 26     | <i>Taraxacum officinale</i> |
| TC3             | EST-SSR | CTOY2052.b1_H09.ab1  | 26     | <i>Taraxacum officinale</i>         | TC604  | EST-SSR | CTOY1842.b1_D06.ab1  | 26     | <i>Taraxacum officinale</i> |
| TC4             | EST-SSR | CTOX15289.b1_B08.ab1 | 26     | <i>Taraxacum officinale</i>         | TC946  | EST-SSR | CTOY13679.b1_M12.ab1 | 26     | <i>Taraxacum officinale</i> |
| TC5             | EST-SSR | CTOX18135.b1_M21.ab1 | 26     | <i>Taraxacum officinale</i>         | TC1022 | EST-SSR | CTOY6770.b1_C14.ab1  | 26     | <i>Taraxacum officinale</i> |
| TC7             | EST-SSR | CTOX2872.b1_P21.ab1  | 26     | <i>Taraxacum officinale</i>         | TC712  | EST-SSR | CTOX1043.b1_E22.ab1  | 26     | <i>Taraxacum officinale</i> |
| TC9             | EST-SSR | CTOX6666.b1_D11.ab1  | 26     | <i>Taraxacum officinale</i>         | TC513  | EST-SSR | CTOX20664.b1_P06.ab1 | 26     | <i>Taraxacum officinale</i> |
| TC10            | EST-SSR | CTOX18729.b2_B04.ab1 | 26     | <i>Taraxacum officinale</i>         |        |         |                      |        |                             |

**Legend:** NM: Not Mapped; COS: Conserved Ortholog Set; SSR: Simple Sequence Repeat; EST-SSR: Expressed Sequence Tag-Simple Sequence Repeat; STS: Sequence-Tagged Sites; TC: EST-SSR given name; Reference: Bibliographic reference.

**Supplementary Table S2: Obtained homologies of TC markers using Blast2Go.**

| SEQNAME | DESCRIPTION                                                                  | LENGTH | HITS | E-VALUE  | SIM MEAN | GO | GO NAMES LIST                                                                                                                                                                                                                                                                                                                                                                                                                                                                                                                                                                                                                     | ENZYME CODES                                         |
|---------|------------------------------------------------------------------------------|--------|------|----------|----------|----|-----------------------------------------------------------------------------------------------------------------------------------------------------------------------------------------------------------------------------------------------------------------------------------------------------------------------------------------------------------------------------------------------------------------------------------------------------------------------------------------------------------------------------------------------------------------------------------------------------------------------------------|------------------------------------------------------|
| TC1107  | zinc ion binding                                                             | 892    | 20   | 1.9E-85  | 69.65%   | 1  | F:metal ion binding                                                                                                                                                                                                                                                                                                                                                                                                                                                                                                                                                                                                               | -                                                    |
| TC128   | u-box domain-containing protein 7-like                                       | 928    | 20   | 6.3E-33  | 61.65%   | 1  | F:protein binding                                                                                                                                                                                                                                                                                                                                                                                                                                                                                                                                                                                                                 | -                                                    |
| TC129   | mannanendo- $\beta$ -mannosidase 2-like                                      | 914    | 20   | 3.9E-41  | 78.25%   | 2  | F:hydrolase activity, hydrolyzing O-glycosyl compounds; P:carbohydrate metabolic process                                                                                                                                                                                                                                                                                                                                                                                                                                                                                                                                          | -                                                    |
| TC13    | coiled-coil domain-containing protein 97                                     | 906    | 20   | 5.9E-103 | 78%      | 2  | P:biological_process; C:cellular_component                                                                                                                                                                                                                                                                                                                                                                                                                                                                                                                                                                                        | -                                                    |
| TC165   | probable arabinosyltransferase arad1                                         | 819    | 20   | 2.3E-24  | 79.65%   | 3  | P:biological_process; F:transferase activity; P:metabolic process                                                                                                                                                                                                                                                                                                                                                                                                                                                                                                                                                                 | -                                                    |
| TC19    | protein n-lysine methyltransferase mett121a                                  | 905    | 20   | 6.6E-123 | 83.25%   | 4  | F:histone acetyltransferase activity; F:methyltransferase activity; P:histone acetylation; P:methylation                                                                                                                                                                                                                                                                                                                                                                                                                                                                                                                          | EC:2.3.1.48; EC:2.3.1                                |
| TC2059  | actin-related protein 9                                                      | 392    | 20   | 7.6E-45  | 83.9%    | 3  | C:Ino80 complex; P:chromatin remodeling; P:vegetative to reproductive phase transition of meristem                                                                                                                                                                                                                                                                                                                                                                                                                                                                                                                                | -                                                    |
| TC22A   | Something about silencing protein 10                                         | 906    | 20   | 4.8E-58  | 67.05%   | 0  | -                                                                                                                                                                                                                                                                                                                                                                                                                                                                                                                                                                                                                                 | -                                                    |
| TC22B   | Something about silencing protein 10                                         | 906    | 20   | 4.8E-58  | 67.05%   | 0  | -                                                                                                                                                                                                                                                                                                                                                                                                                                                                                                                                                                                                                                 | -                                                    |
| TC249   | Coatomer subunit zeta-1-like protein                                         | 790    | 20   | 2.0E-100 | 95.65%   | 8  | C:membrane; P:protein folding; P:response to heat; P:response to high light intensity; P:protein transport; P:response to endoplasmic reticulum stress; P:response to hydrogen peroxide; P:positive regulation of transcription, DNA-templated                                                                                                                                                                                                                                                                                                                                                                                    | -                                                    |
| TC25    | uncharacterized calcium-binding protein at1g02270-like isoform x2            | 883    | 20   | 9.7E-89  | 78.75%   | 1  | F:calcium ion binding                                                                                                                                                                                                                                                                                                                                                                                                                                                                                                                                                                                                             | -                                                    |
| TC27    | duf581 family protein                                                        | 660    | 20   | 9.0E-20  | 79.35%   | -  | -                                                                                                                                                                                                                                                                                                                                                                                                                                                                                                                                                                                                                                 | -                                                    |
| TC28    | gpi-anchor transamidase isoform x1                                           | 874    | 20   | 1.2E-80  | 96.85%   | 7  | C:GPI-anchor transamidase complex; F:GPI-anchor transamidase activity; F:cysteine-type endopeptidase activity; P:proteolysis; P:sterol biosynthetic process; P:attachment of GPI anchor to protein; P:sphingoid biosynthetic process                                                                                                                                                                                                                                                                                                                                                                                              | EC:3.4.22; EC:3.4; EC:3                              |
| TC29    | Nucleolar protein                                                            | 558    | 20   | 4.5E-31  | 63.45%   | 3  | P:root hair cell differentiation; P:biological_process; C:integral component of membrane                                                                                                                                                                                                                                                                                                                                                                                                                                                                                                                                          | -                                                    |
| TC295   | PREDICTED: uncharacterized protein LOC101202853 isoform X1                   | 485    | 20   | 1.4E-16  | 68.65%   | 1  | C:Golgi apparatus                                                                                                                                                                                                                                                                                                                                                                                                                                                                                                                                                                                                                 | -                                                    |
| TC303   | glycerol-3-phosphate acyltransferase                                         | 818    | 20   | 3.0E-61  | 75.25%   | 6  | C:chloroplast; F:transferase activity, transferring acyl groups; P:isoprenoid biosynthetic process; P:monocarboxylic acid metabolic process; P:pigment biosynthetic process; P:glycerophospholipid biosynthetic process                                                                                                                                                                                                                                                                                                                                                                                                           | -                                                    |
| TC32    | regulator of nonsense transcripts upf3-like isoform x2                       | 825    | 20   | 9.0E-30  | 53.05%   | 1  | F:nucleotide binding                                                                                                                                                                                                                                                                                                                                                                                                                                                                                                                                                                                                              | -                                                    |
| TC324   | PREDICTED: uncharacterized protein LOC104219523                              | 874    | 20   | 3.5E-98  | 86.35%   | 9  | P:maltose metabolic process; P:phosphatidylglycerol biosynthetic process; P:embryo development ending in seed dormancy; P:thylakoid membrane organization; P:stomatal complex morphogenesis; P:iron-sulfur cluster assembly; P:starch biosynthetic process; P:isopentenyl diphosphate biosynthetic process, methylerythritol 4-phosphate pathway; P:positive regulation of catalytic activity                                                                                                                                                                                                                                     | -                                                    |
| TC360   | formin-like protein 8 isoform x2                                             | 653    | 20   | 6.8E-34  | 69.65%   | 1  | P:phosphatidylinositol biosynthetic process                                                                                                                                                                                                                                                                                                                                                                                                                                                                                                                                                                                       | -                                                    |
| TC365   | probable sphingolipid transporter spinstar homolog 2                         | 873    | 20   | 1.9E-110 | 87.65%   | 6  | C:intracellular; C:integral component of membrane; P:fatty acid beta-oxidation; P:sterol biosynthetic process; P:protein import into peroxisome matrix; P:sphingoid biosynthetic process                                                                                                                                                                                                                                                                                                                                                                                                                                          | -                                                    |
| TC366   | probable inactive receptor kinase at1g48480                                  | 943    | 20   | 1.1E-68  | 72.75%   | 4  | C:membrane; F:nucleotide binding; F:protein kinase activity; P:phosphorylation                                                                                                                                                                                                                                                                                                                                                                                                                                                                                                                                                    | -                                                    |
| TC38    | PREDICTED: uncharacterized protein LOC105160266 isoform X3                   | 704    | 12   | 2.4E-15  | 51.83%   | 1  | P:cellular process                                                                                                                                                                                                                                                                                                                                                                                                                                                                                                                                                                                                                | -                                                    |
| TC41A   | PREDICTED: uncharacterized protein LOC105157371                              | 834    | 20   | 4.8E-81  | 91.95%   | 0  | -                                                                                                                                                                                                                                                                                                                                                                                                                                                                                                                                                                                                                                 | -                                                    |
| TC41B   | PREDICTED: uncharacterized protein LOC105157371                              | 834    | 20   | 4.8E-81  | 91.95%   | -  | -                                                                                                                                                                                                                                                                                                                                                                                                                                                                                                                                                                                                                                 | -                                                    |
| TC42    | udp-d-epioseudp-d-xylose synthase 2-like                                     | 864    | 20   | 4.1E-172 | 95.8%    | 3  | F:catalytic activity; F:coenzyme binding; P:metabolic process                                                                                                                                                                                                                                                                                                                                                                                                                                                                                                                                                                     | -                                                    |
| TC428   | coatomersubunit zeta-1-like                                                  | 832    | 20   | 3.0E-99  | 95.05%   | 8  | C:membrane; P:protein folding; P:response to heat; P:response to high light intensity; P:protein transport; P:response to endoplasmic reticulum stress; P:response to hydrogen peroxide; P:positive regulation of transcription, DNA-templated                                                                                                                                                                                                                                                                                                                                                                                    | -                                                    |
| TC438   | Unnamed protein product                                                      | 719    | 20   | 1.6E-60  | 78.1%    | -  | -                                                                                                                                                                                                                                                                                                                                                                                                                                                                                                                                                                                                                                 | -                                                    |
| TC45A   | Uncharacterized serine-rich protein                                          | 887    | 20   | 1.8E-23  | 79.95%   | -  | -                                                                                                                                                                                                                                                                                                                                                                                                                                                                                                                                                                                                                                 | -                                                    |
| TC45B   | Uncharacterized serine-rich protein                                          | 887    | 20   | 1.7E-23  | 79.95%   | -  | -                                                                                                                                                                                                                                                                                                                                                                                                                                                                                                                                                                                                                                 | -                                                    |
| TC461   | udp-glycosyltransferase 84b2-like                                            | 789    | 20   | 4.1E-82  | 65.9%    | 2  | F:transferase activity, transferring hexosyl groups; P:metabolic process                                                                                                                                                                                                                                                                                                                                                                                                                                                                                                                                                          | -                                                    |
| TC46A   | polypyrimidine tract-binding protein homolog 2-like isoform x1               | 859    | 20   | 1.1E-35  | 66.5%    | 1  | F:nucleotide binding                                                                                                                                                                                                                                                                                                                                                                                                                                                                                                                                                                                                              | -                                                    |
| TC46B   | polypyrimidine tract-binding protein homolog 2-like isoform x1               | 859    | 20   | 1.1E-35  | 66.5%    | 1  | F:nucleotide binding                                                                                                                                                                                                                                                                                                                                                                                                                                                                                                                                                                                                              | -                                                    |
| TC46C   | polypyrimidine tract-binding protein homolog 2-like isoform x1               | 859    | 20   | 1.1E-35  | 66.5%    | 1  | F:nucleotide binding                                                                                                                                                                                                                                                                                                                                                                                                                                                                                                                                                                                                              | -                                                    |
| TC49    | rac-like gtp-binding protein arac7                                           | 899    | 20   | 9.0E-127 | 94.55%   | 10 | C:intracellular; C:plasma membrane; F:GTPase activity; F:sphingomyelin phosphodiesterase activity; F:GTP binding; P:intracellular protein transport; P:nucleocytoplasmic transport; P:actin filament organization; P:small GTPase mediated signal transduction; P:metabolic process                                                                                                                                                                                                                                                                                                                                               | EC:3.6.1; EC:3.1; EC:3.1.4.12; EC:3.1.1; EC:3.6.1.15 |
| TC494   | protein nrt1 ptr family -like                                                | 846    | 20   | 7.7E-117 | 83.3%    | 3  | C:membrane; F:transporter activity; P:transport                                                                                                                                                                                                                                                                                                                                                                                                                                                                                                                                                                                   | -                                                    |
| TC506   | probable inactive leucine-rich repeat receptor-like protein kinase at3g03770 | 917    | 20   | 2.0E-14  | 70.55%   | 4  | F:kinase activity; P:phosphorylation; P:response to stimulus; P:organic substance metabolic process                                                                                                                                                                                                                                                                                                                                                                                                                                                                                                                               | -                                                    |
| TC50A   | rab6-interacting golgin-like                                                 | 868    | 20   | 6.7E-76  | 94.5%    | 2  | C:plasma membrane; P:response to auxin                                                                                                                                                                                                                                                                                                                                                                                                                                                                                                                                                                                            | -                                                    |
| TC50B   | rab6-interacting golgin-like                                                 | 868    | 20   | 6.7E-76  | 94.7%    | -  | -                                                                                                                                                                                                                                                                                                                                                                                                                                                                                                                                                                                                                                 | -                                                    |
| TC585   | F-box family isoform 1                                                       | 491    | 20   | 2.2E-35  | 55.8%    | 2  | F:DNA binding; P:regulation of transcription, DNA-templated                                                                                                                                                                                                                                                                                                                                                                                                                                                                                                                                                                       | -                                                    |
| TC60    | protein elf4-like 4-like                                                     | 718    | 20   | 1.5E-45  | 85.1%    | -  | -                                                                                                                                                                                                                                                                                                                                                                                                                                                                                                                                                                                                                                 | -                                                    |
| TC61A   | mannanendo- $\beta$ -mannosidase 2-like                                      | 800    | 20   | 1.8E-24  | 76.9%    | 2  | F:hydrolase activity, hydrolyzing O-glycosyl compounds; P:carbohydrate metabolic process                                                                                                                                                                                                                                                                                                                                                                                                                                                                                                                                          | -                                                    |
| TC61B   | mannanendo- $\beta$ -mannosidase 2-like                                      | 800    | 20   | 1.8E-24  | 76.9%    | 2  | F:hydrolase activity, hydrolyzing O-glycosyl compounds; P:carbohydrate metabolic process                                                                                                                                                                                                                                                                                                                                                                                                                                                                                                                                          | -                                                    |
| TC61C   | mannanendo- $\beta$ -mannosidase 2-like                                      | 800    | 20   | 1.8E-24  | 76.9%    | 2  | F:hydrolase activity, hydrolyzing O-glycosyl compounds; P:carbohydrate metabolic process                                                                                                                                                                                                                                                                                                                                                                                                                                                                                                                                          | -                                                    |
| TC624   | benzyl alcohol o-benzoyltransferase                                          | 918    | 20   | 0.0E0    | 86.55%   | 2  | F:transferase activity, transferring acyl groups other than amino-acyl groups; P:metabolic process                                                                                                                                                                                                                                                                                                                                                                                                                                                                                                                                | -                                                    |
| TC66    | duf581 family protein                                                        | 683    | 20   | 7.1E-21  | 76.4%    | -  | -                                                                                                                                                                                                                                                                                                                                                                                                                                                                                                                                                                                                                                 | -                                                    |
| TC69    | rho gdp-dissociation inhibitor 1                                             | 826    | 20   | 3.4E-65  | 75.75%   | 3  | C:cytoplasm; F:Rho GDP-dissociation inhibitor activity; P:regulation of catalytic activity                                                                                                                                                                                                                                                                                                                                                                                                                                                                                                                                        | -                                                    |
| TC71    | novel plantsnare 13-like                                                     | 871    | 20   | 3.0E-93  | 90.6%    | 0  | -                                                                                                                                                                                                                                                                                                                                                                                                                                                                                                                                                                                                                                 | -                                                    |
| TC713   | rho gtpase activation protein with ph domain isoform 1                       | 857    | 20   | 6.3E-61  | 71.5%    | 1  | P:signal transduction                                                                                                                                                                                                                                                                                                                                                                                                                                                                                                                                                                                                             | -                                                    |
| TC73    | udp-glucuronic acid decarboxylase 6-like                                     | 569    | 20   | 1.9E-56  | 89.7%    | 3  | F:catalytic activity; F:coenzyme binding; P:metabolic process                                                                                                                                                                                                                                                                                                                                                                                                                                                                                                                                                                     | -                                                    |
| TC731   | ---NA---                                                                     | 269    | 0    | -        | -        | -  | -                                                                                                                                                                                                                                                                                                                                                                                                                                                                                                                                                                                                                                 | -                                                    |
| TC77    | Pyridoxal biosynthesis protein                                               | 876    | 20   | 6.2E-159 | 97.05%   | 18 | C:cytosol; C:plasma membrane; C:endomembrane system; F:pyridoxal 5'-phosphate synthase (glutamine hydrolysing) activity; F:protein homodimerization activity; F:protein heterodimerization activity; P:maltose metabolic process; P:pentose-phosphate shunt; P:cellular amino acid metabolic process; P:response to lipid hydroperoxide; P:pyridoxine biosynthetic process; P:response to UV-B; P:response to non-ionic osmotic stress; P:chlorophyll metabolic process; P:starch biosynthetic process; P:hyperosmotic salinity response; P:pyridoxal phosphate biosynthetic process; P:positive regulation of catalytic activity | EC:4.3.3.6                                           |
| TC80A   | serine threonine-protein kinase d6pk                                         | 915    | 20   | 2.0E-92  | 88.2%    | 7  | C:nucleolus; C:cytoplasm; F:protein kinase activity; F:ATP binding; P:microtubule cytoskeleton organization; P:cytokinesis by cell plate formation; P:protein phosphorylation                                                                                                                                                                                                                                                                                                                                                                                                                                                     | -                                                    |
| TC80B   | serine threonine-protein kinase d6pk                                         | 915    | 20   | 2.0E-92  | 88.2%    | 7  | C:nucleolus; C:cytoplasm; F:protein kinase activity; F:ATP binding; P:microtubule cytoskeleton organization; P:cytokinesis by cell plate formation; P:protein phosphorylation                                                                                                                                                                                                                                                                                                                                                                                                                                                     | -                                                    |
| TC82A   | tpr repeat-containing thioredoxin tt1-like                                   | 777    | 20   | 1.1E-16  | 59.2%    | 2  | P:cell redox homeostasis; C:cell                                                                                                                                                                                                                                                                                                                                                                                                                                                                                                                                                                                                  | -                                                    |
| TC82B   | tpr repeat-containing thioredoxin tt1-like                                   | 777    | 20   | 1.1E-16  | 59.2%    | 2  | P:cell redox homeostasis; C:cell                                                                                                                                                                                                                                                                                                                                                                                                                                                                                                                                                                                                  | -                                                    |
| TC83A   | protein elf4-like 4                                                          | 734    | 20   | 2.6E-54  | 89.85%   | -  | -                                                                                                                                                                                                                                                                                                                                                                                                                                                                                                                                                                                                                                 | -                                                    |
| TC83B   | protein elf4-like 4                                                          | 734    | 20   | 2.6E-54  | 89.85%   | -  | -                                                                                                                                                                                                                                                                                                                                                                                                                                                                                                                                                                                                                                 | -                                                    |
| TC83C   | protein elf4-like 4                                                          | 734    | 20   | 2.6E-54  | 89.85%   | -  | -                                                                                                                                                                                                                                                                                                                                                                                                                                                                                                                                                                                                                                 | -                                                    |
| TC84A   | auxilin-related protein 2 isoform x2                                         | 712    | 20   | 5.3E-16  | 90.15%   | 2  | F:transferase activity; P:metabolic process                                                                                                                                                                                                                                                                                                                                                                                                                                                                                                                                                                                       | -                                                    |
| TC84B   | auxilin-related protein 2 isoform x2                                         | 712    | 20   | 5.3E-16  | 90.15%   | 2  | F:transferase activity; P:metabolic process                                                                                                                                                                                                                                                                                                                                                                                                                                                                                                                                                                                       | -                                                    |
| TC84C   | auxilin-related protein 2 isoform x2                                         | 712    | 20   | 5.3E-16  | 90.15%   | 2  | F:transferase activity; P:metabolic process                                                                                                                                                                                                                                                                                                                                                                                                                                                                                                                                                                                       | -                                                    |
| TC84D   | auxilin-related protein 2 isoform x2                                         | 712    | 20   | 5.3E-16  | 90.15%   | 2  | F:transferase activity; P:metabolic process                                                                                                                                                                                                                                                                                                                                                                                                                                                                                                                                                                                       | -                                                    |

**Legend:** F: Molecular Function; P: Biological Process; C: Cellular Component; GO: Gene Ontology; SIM Mean: % of similitude; Seq Name: Sequence Name.
